# Supplementary material for: Improved phylogenomic sampling of free-living nematodes enhances resolution of higher-level nematode phylogeny
Source: PubMed Central journal article supplement (PMC6567515; doi:10.1186/s12862-019-1444-x), 2019-06-13

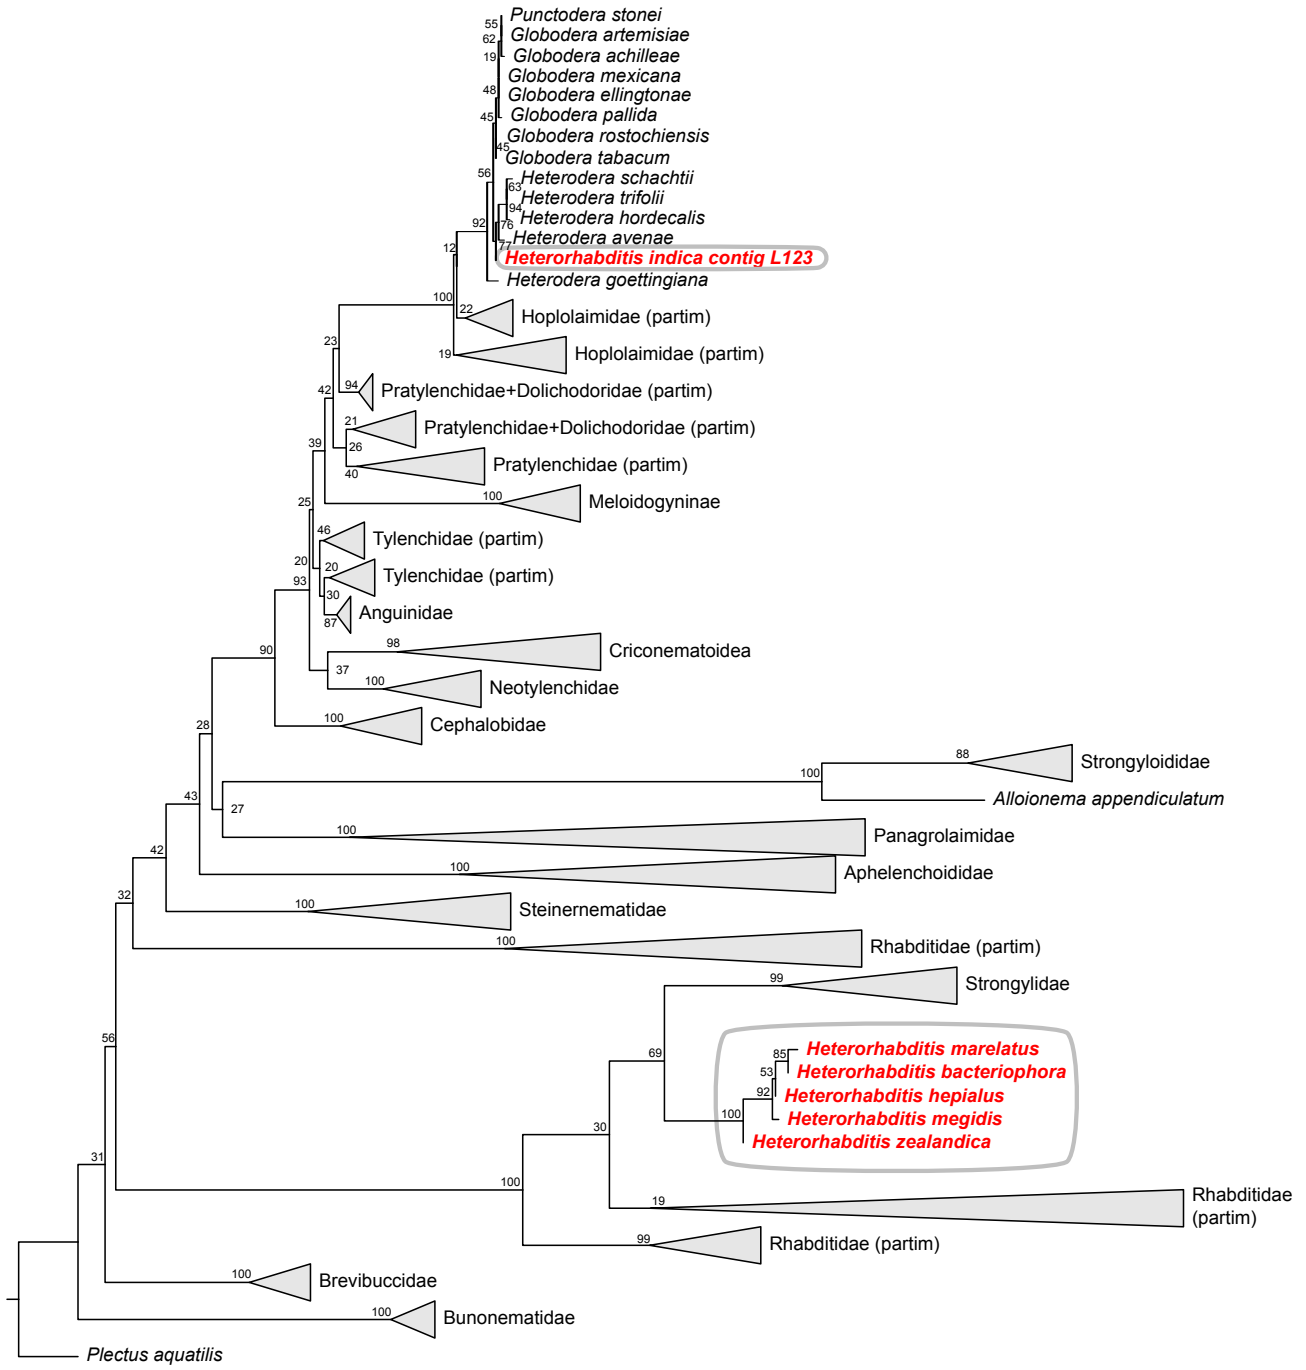

Supplement: 12862_2019_1444_MOESM1_ESM.pdf [file 12862_2019_1444_MOESM1_ESM.pdf]
